# Supplementary material for: Efficient electroluminescence of bluish green iridium complexes with 2-(3,5-bis(trifluoromethyl)phenyl)pyrimidine and 2-(3,5-bis(trifluoromethyl)phenyl)-5-fluoropyrimidine as the main ligands
Source: Royal Society of Chemistry journal article supplement (doi:10.1039/c8qi00294k), 2018-01-01
Supplement: c8qi00294k1.pdf [file c8qi00294k1.pdf]

## Supporting Information

### Efficient electroluminescence of bluish green iridium complexes with 2-(3,5-bis(trifluoromethyl)phenyl)pyrimidine and 2-(3,5-bis(trifluoromethyl)phenyl)-5-fluoropyrimidine main ligands

Hua-Bo Han<sup>1</sup>, Zheng-Guang Wu<sup>1</sup>, You-Xuan Zheng<sup>\*1,2</sup>

<sup>1</sup> State Key Laboratory of Coordination Chemistry, Jiangsu Key Laboratory of Advanced Organic Materials, Collaborative Innovation Center of Advanced Microstructures, School of Chemistry and Chemical Engineering, Nanjing University, Nanjing 210093, P. R. China, [yxzheng@nju.edu.cn](mailto:yxzheng@nju.edu.cn)

<sup>2</sup> Shenzhen Research Institute of Nanjing University, Shenzhen 518057, P. R. China

#### General information

<sup>1</sup>H NMR spectra were measured on a Bruker AM 500 spectrometer. Electrospray ionization mass spectra (ESI-MS) were obtained with ESI-MS (LCQ Fleet, Thermo Fisher Scientific) and Matrix Assisted Laser Desorption Ionization Time of Flight Mass Spectrometry (autoflex TOF/TOF, Bruker Daltonics). Elemental analyses for C, H and N were performed on an Elementar Vario MICRO analyzer. TG-DSC measurements were carried out on a DSC 823e analyzer (METTLER). UV-vis absorption and photoluminescence spectra were measured on a Shimadzu UV-3100 and a Hitachi F-4600 spectrophotometer at room temperature, respectively. The emission spectra at 77 K were measured on Hitachi F-4600 spectrophotometer. Cyclic voltammetry measurements were conducted on a MPI-A multifunctional electrochemical and chemiluminescent system at room temperature using Fc<sup>+</sup>/Fc as the internal standard and scan rate of 0.05 V s<sup>-1</sup>. The luminescence quantum efficiencies were calculated by comparison of the emission intensities (integrated areas) of a standard sample (*fac*-Ir(ppy)<sub>3</sub>) and the unknown sample.<sup>1</sup> The decay lifetimes were measured with an HORIBA Scientific 3-D fluorescence spectrometer.

#### X-ray crystallography

X-ray crystallographic measurements of the single crystals were carried out on a Bruker SMART CCD diffractometer (Bruker Daltonic Inc.) using monochromated Mo K $\alpha$  radiation

( $\lambda = 0.71073 \text{ \AA}$ ) at room temperature. Cell parameters were retrieved using SMART software and refined using *SAINTE*<sup>2</sup> program in order to reduce the highly redundant data sets. Data were collected using a narrow-frame method with scan width of  $0.30^\circ$  in  $\omega$  and an exposure time of 5 s per frame. Absorption corrections were applied using *SADABS*<sup>3</sup> supplied by Bruker. The structures were solved by Patterson methods and refined by full-matrix least-squares on  $F^2$  using the program *SHELXS-2014*.<sup>4</sup> The positions of metal atoms and their first coordination spheres were located from direct-methods E-maps, other non-hydrogen atoms were found in alternating difference Fourier syntheses and least-squares refinement cycles and during the final cycles refined anisotropically. Hydrogen atoms were placed in calculated position and refined as riding atoms with a uniform value of  $U_{\text{iso}}$ .

### **OLEDs fabrication and measurement**

All OLEDs were fabricated on the pre-patterned ITO-coated glass substrate with a sheet resistance of  $15 \text{ } \Omega / \text{sq}$ . The deposition rate for organic compounds (TAPC (1,1-*bis*(4-(di-*p*-tolylamino)phenyl)cyclohexane, mCP (1,3-*bis*(9H-carbazol-9-yl)benzene, PPO21 3-(diphenylphosphoryl)-9-(4-(diphenyl-phosphoryl)phenyl)-9H-carbazole, TmPyPB (1,3,5-*tri*(*m*-pyrid-3-yl-phenyl) benzene)) is  $1 \text{ } \text{\AA}/\text{s}$ . The phosphors and the host PPO21 was co-evaporated to form emitting layer from two separate sources. The cathode of LiF and Al were deposited with deposition rates of  $0.1$  and  $3 \text{ } \text{\AA}/\text{s}$ , respectively. The characteristic curves of the devices were measured with a computer which controlled KEITHLEY 2400 source meter with a calibrated silicon diode in air without device encapsulation. On the basis of the uncorrected PL and EL spectra, the Commission Internationale de l'Eclairage (CIE) coordinates were calculated using a test program of the Spectra scan PR650 spectrophotometer.

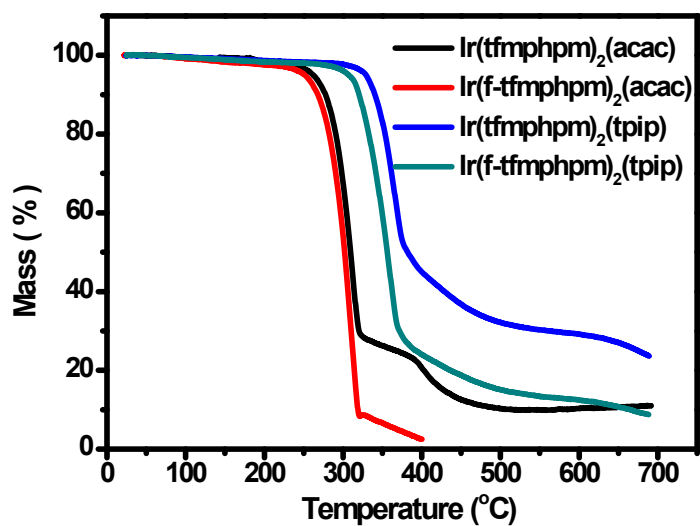

Fig. S1. The TGA curves of Ir(tfmphpm)<sub>2</sub>(acac), Ir(f-tfmphpm)<sub>2</sub>(acac), Ir(tfmphpm)<sub>2</sub>(tpip) and Ir(f-tfmphpm)<sub>2</sub>(tpip).

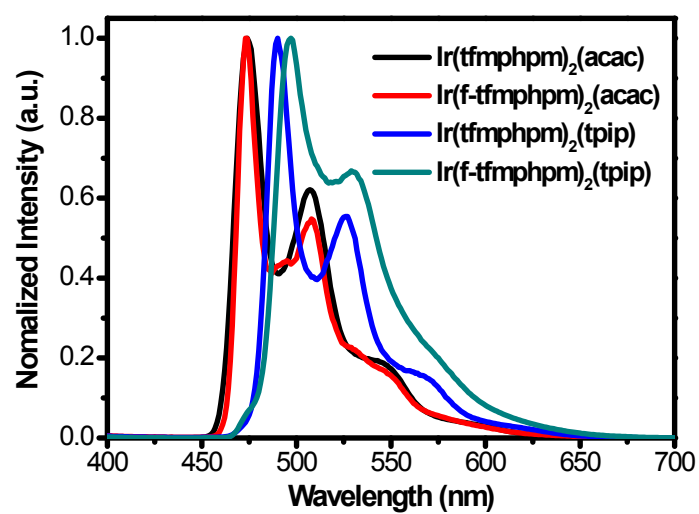

**Fig. S2.** Normalized PL spectra of **Ir(tfmphpm)<sub>2</sub>(acac)**, **Ir(f-tfmphpm)<sub>2</sub>(acac)**, **Ir(tfmphpm)<sub>2</sub>(tpip)** and **Ir(f-tfmphpm)<sub>2</sub>(tpip)** in degassed CH<sub>2</sub>Cl<sub>2</sub> solutions ( $5 \times 10^{-5} \text{ mol} \cdot \text{L}^{-1}$ ) at 77 K.

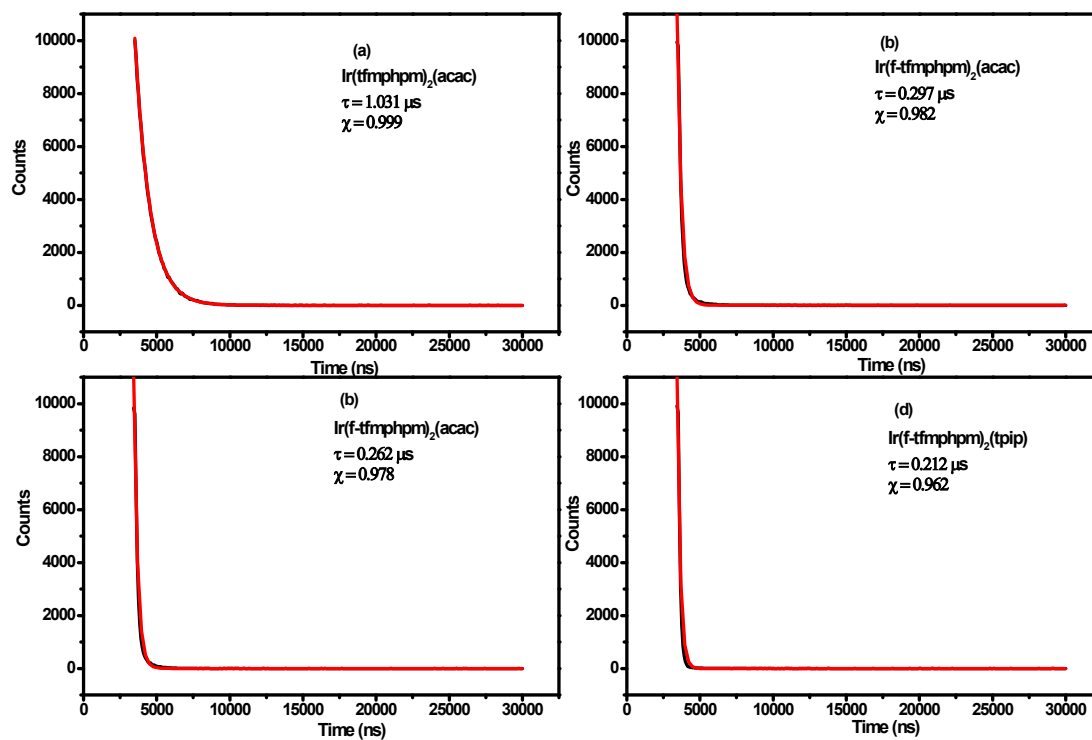

**Fig. S3.** The lifetime curves of  $\text{Ir}(\text{tfmphpm})_2(\text{acac})$ ,  $\text{Ir}(\text{f-tfmphpm})_2(\text{acac})$ ,  $\text{Ir}(\text{tfmphpm})_2(\text{tpip})$  and  $\text{Ir}(\text{f-tfmphpm})_2(\text{tpip})$  complexes.

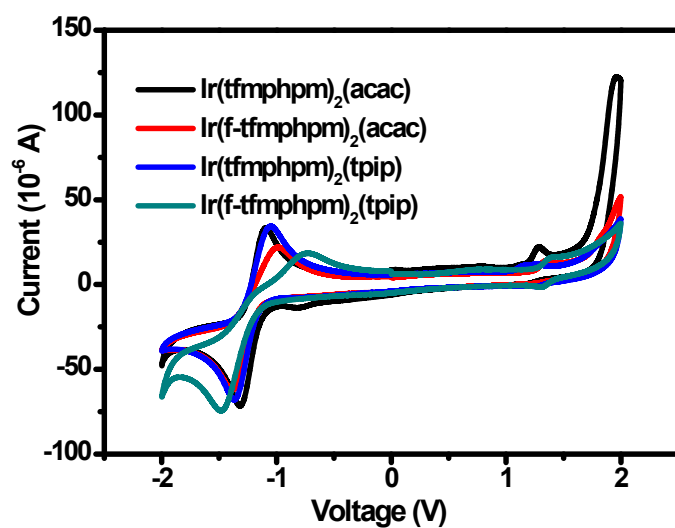

**Fig. S4.** The cyclic voltammogram curves of  $\text{Ir}(\text{tfmphpm})_2(\text{acac})$ ,  $\text{Ir}(\text{f-tfmphpm})_2(\text{acac})$ ,  $\text{Ir}(\text{tfmphpm})_2(\text{tpip})$  and  $\text{Ir}(\text{f-tfmphpm})_2(\text{tpip})$  in the range of -2 – 2 V.

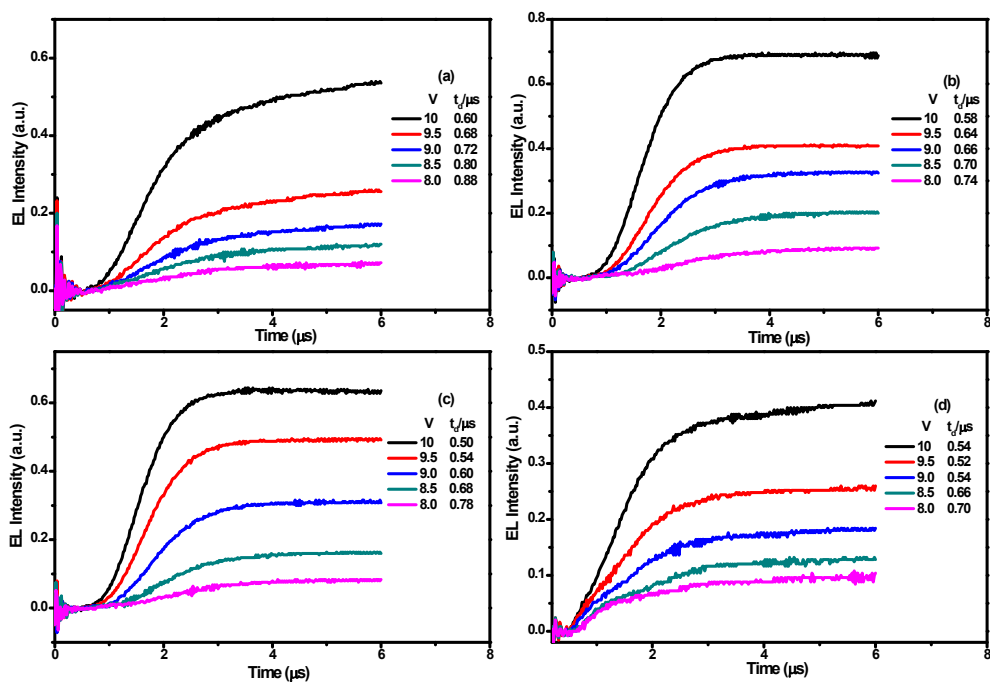

**Fig. S5** (a), (b), (c) and (d) the transient EL signals for the device structure of ITO/ TAPC (50 nm)/ Ir complexes (60 nm) / LiF (1 nm) / Al (100 nm) under different applied fields of **Ir(tfmphpm)<sub>2</sub>(acac)**, **Ir(f-tfmphpm)<sub>2</sub>(acac)**, **Ir(tfmphpm)<sub>2</sub>(tpip)** and **Ir(f-tfmphpm)<sub>2</sub>(tpip)** complexes.

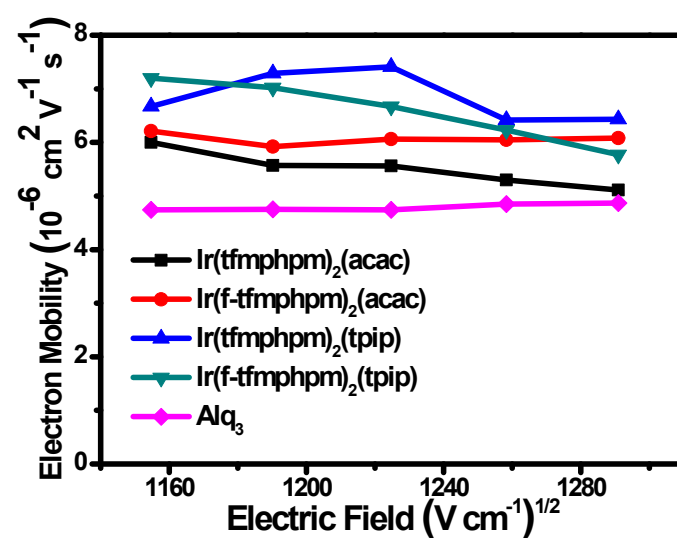

**Fig. S6** Electric field dependence of charge electron mobility in the thin films of  $\text{Ir}(\text{tfmphpm})_2(\text{acac})$ ,  $\text{Ir}(\text{f-tfmphpm})_2(\text{acac})$ ,  $\text{Ir}(\text{tfmphpm})_2(\text{tpip})$ ,  $\text{Ir}(\text{f-tfmphpm})_2(\text{tpip})$  and  $\text{Alq}_3$ .



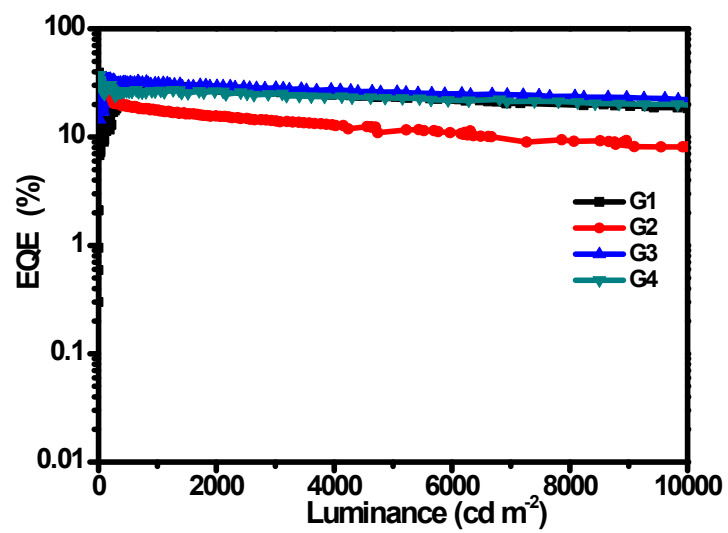

**Fig. S7** The curves of external quantum efficiency (EQE) - luminance of devices **G1**, **G2**, **G3** and **G4**.

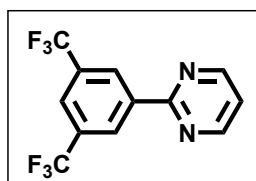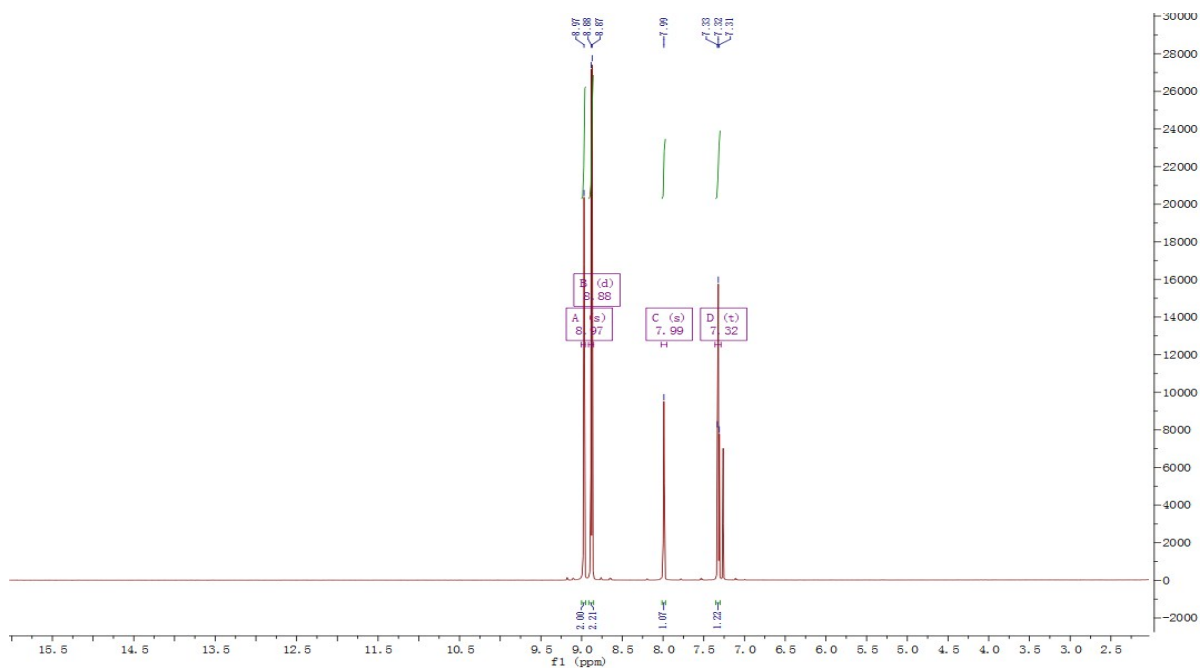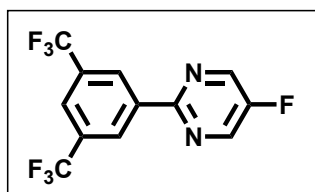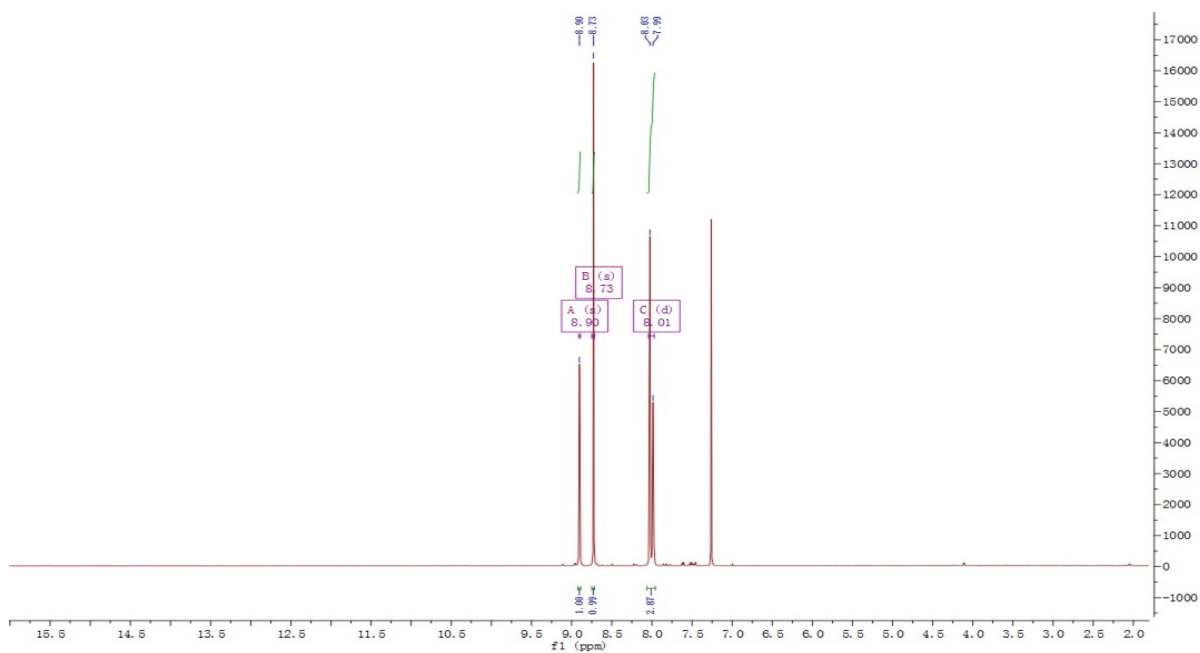

**Fig. S8.** The  $^1\text{H}$  NMR spectra of **tfmphm** and **f-tfmphm**.

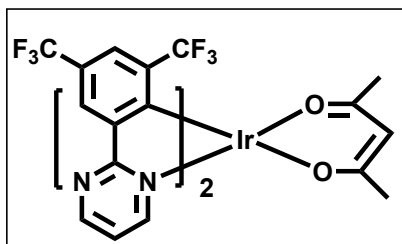

m/z: calcd for  $C_{29}H_{17}F_{12}IrN_4O_2$ , 873.679.

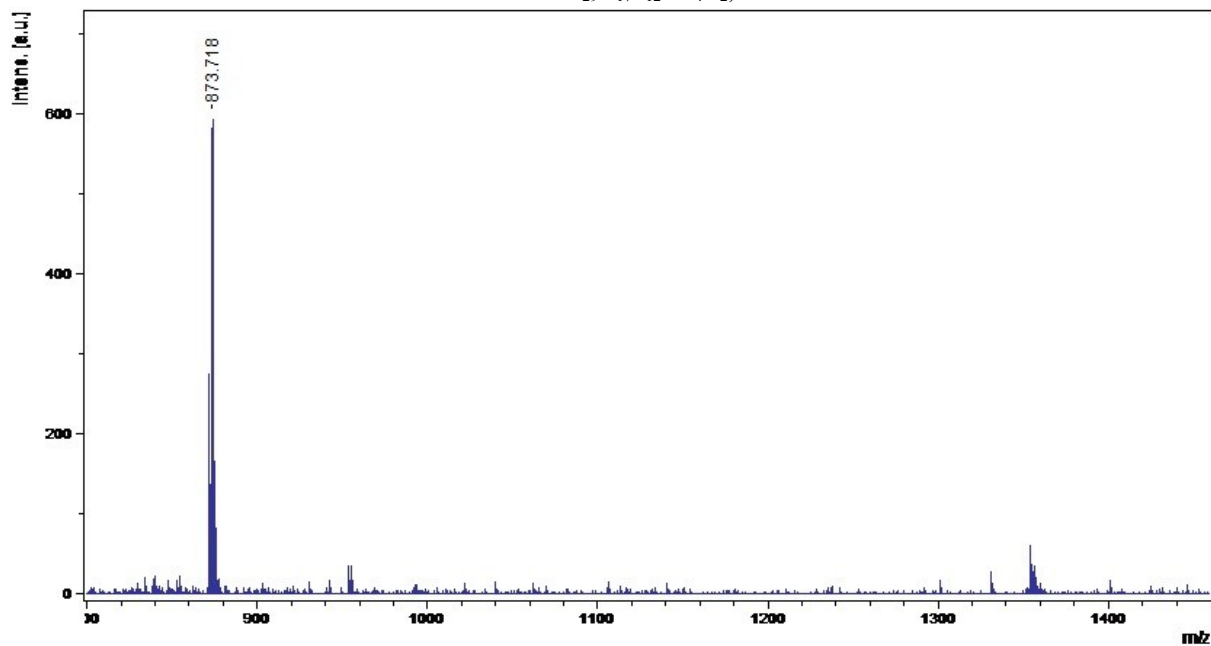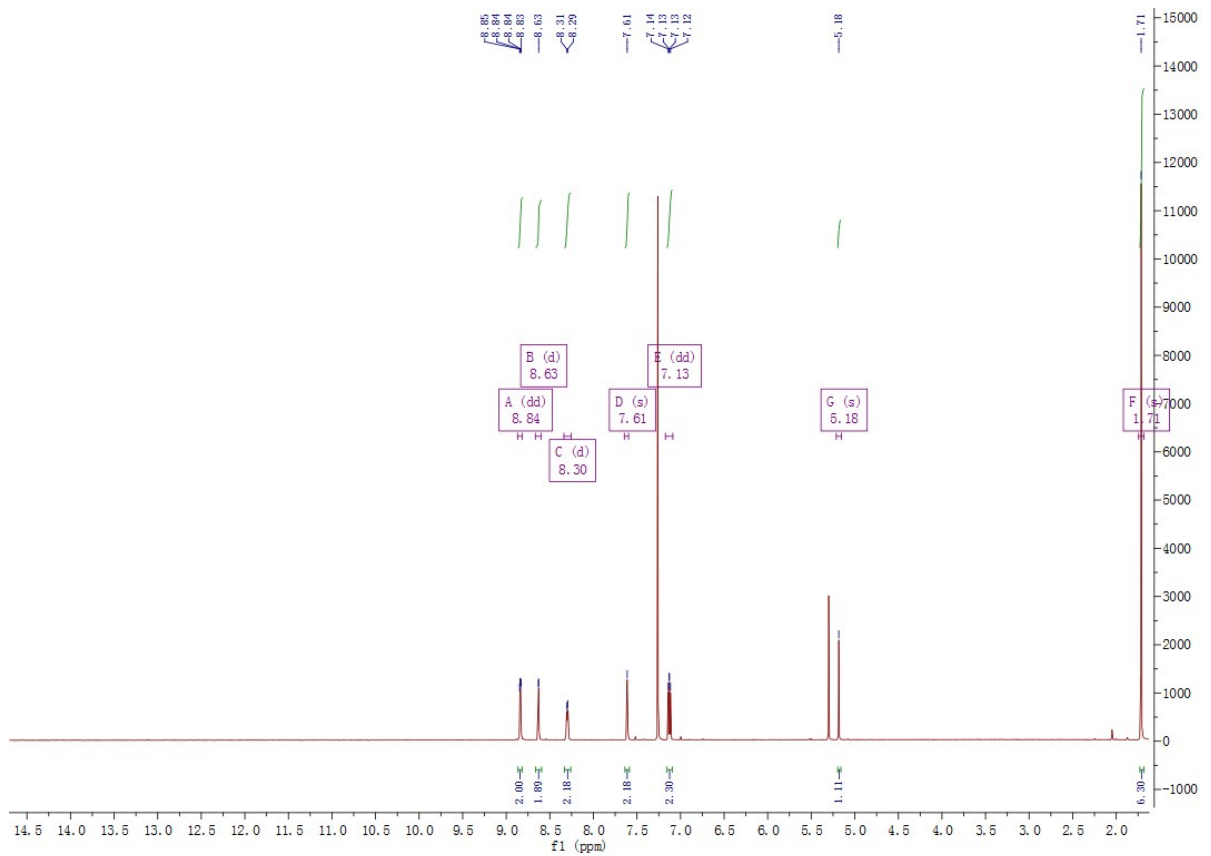

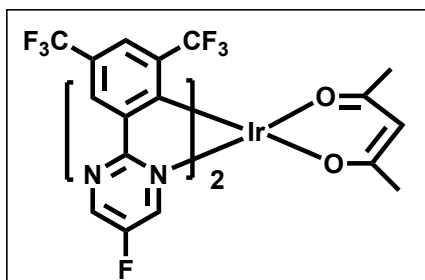

m/z: calcd for  $C_{29}H_{15}F_{14}IrN_4O_2$ , 909.660.

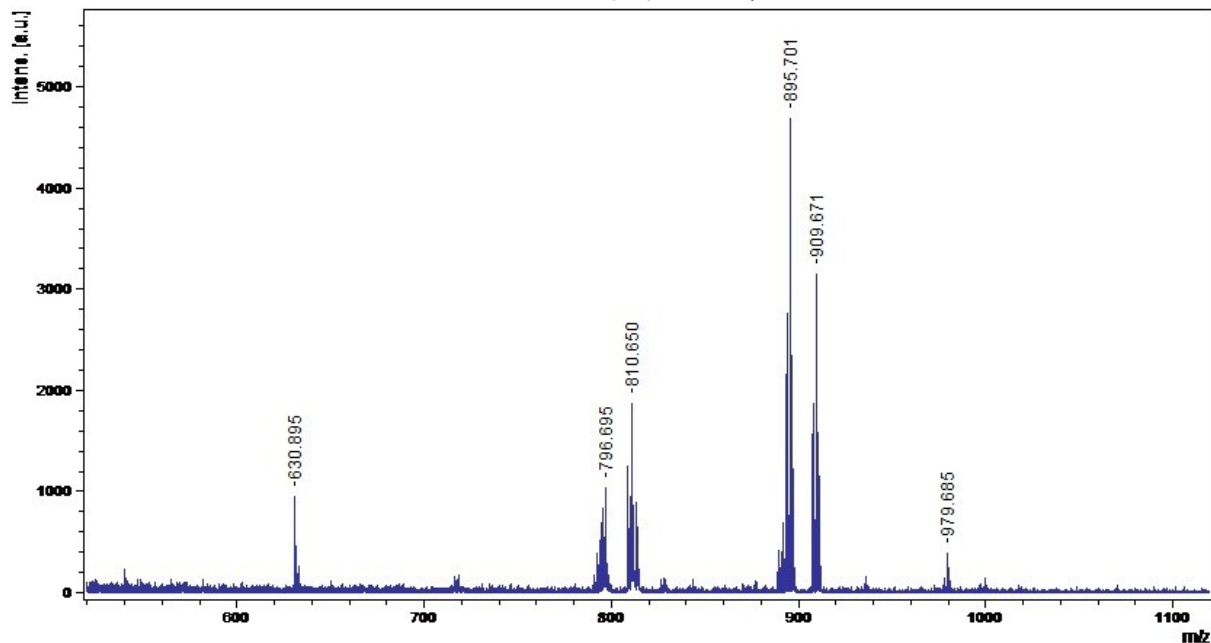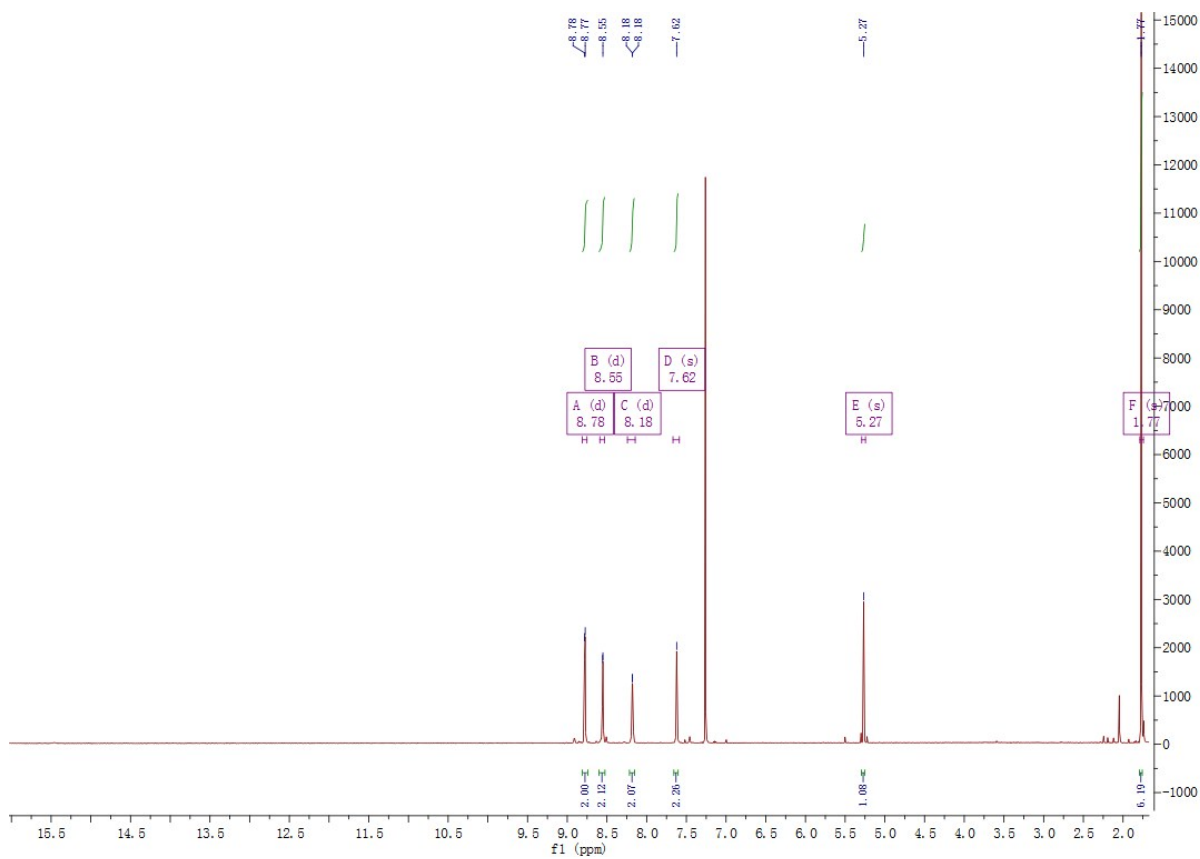

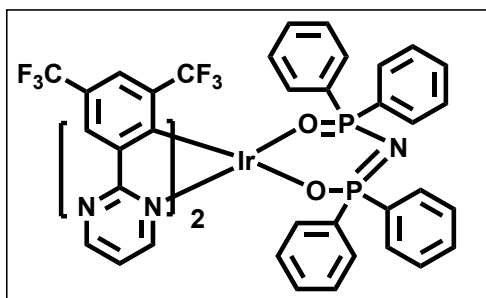

m/z: calcd for  $C_{48}H_{30}F_{12}IrN_5O_2P_2$ , 1190.946.

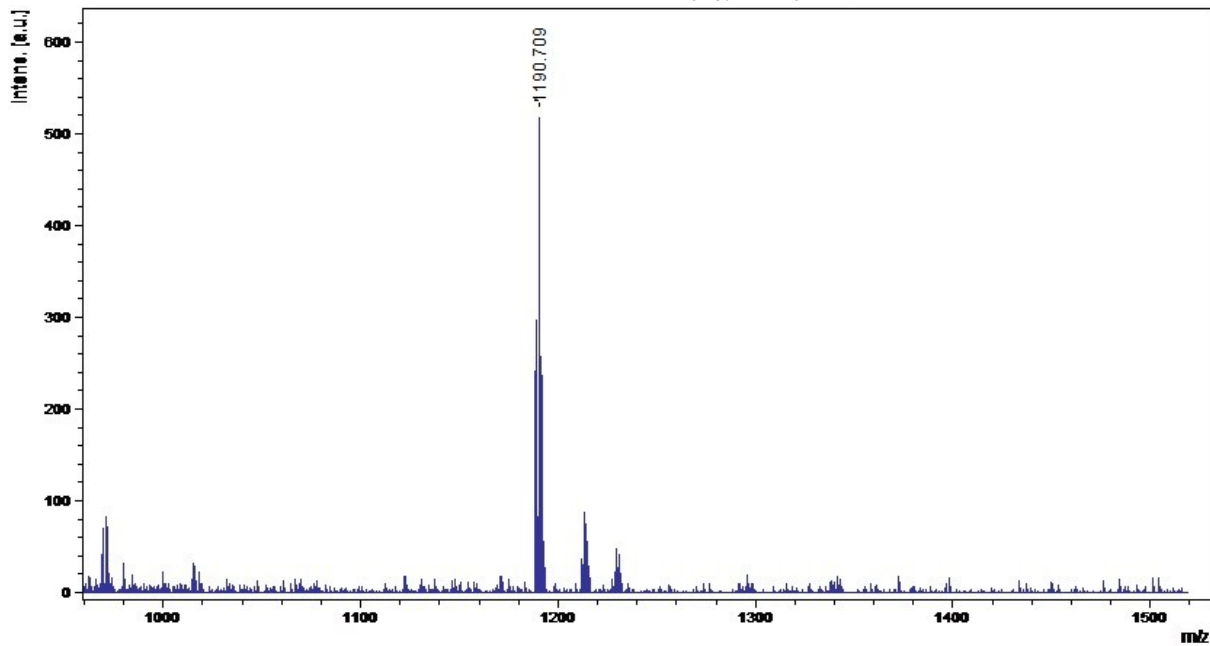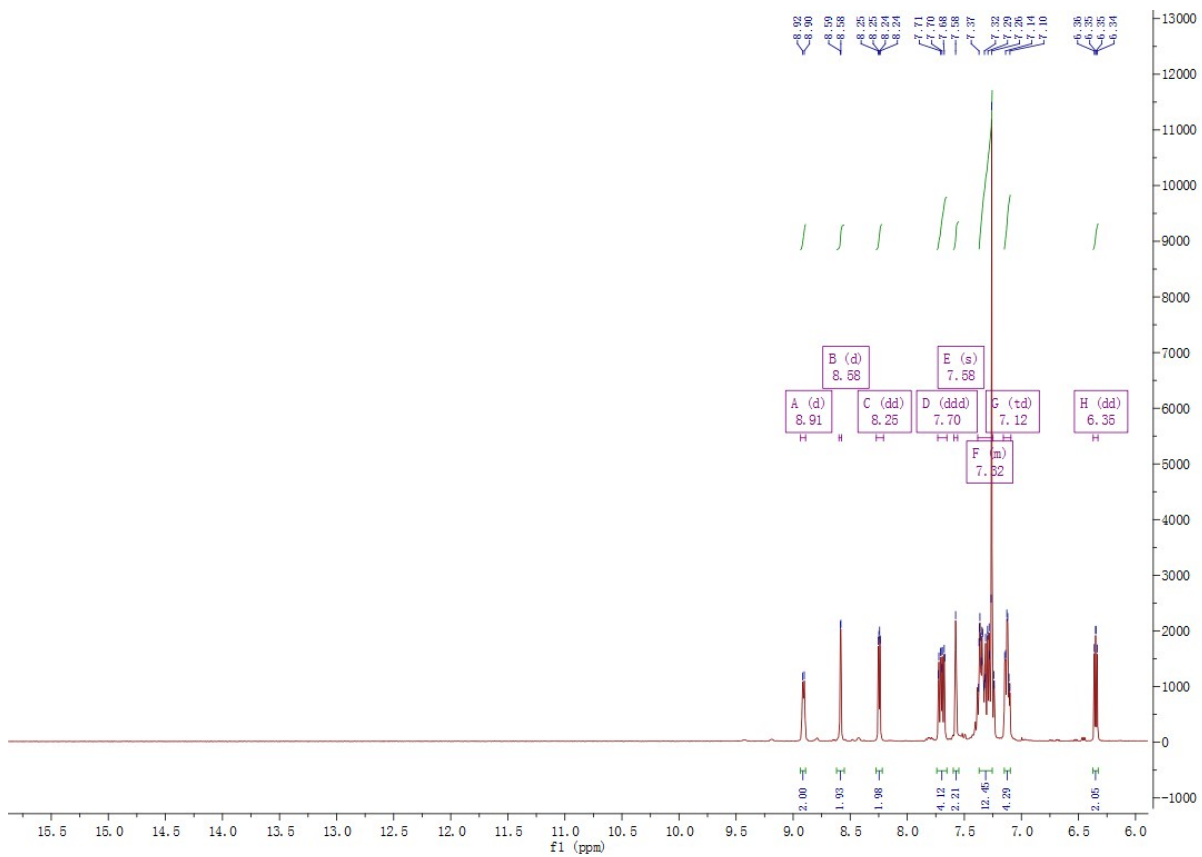

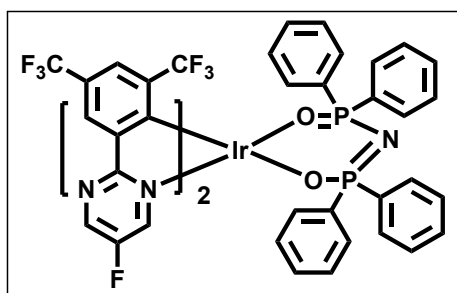

m/z: calcd for  $C_{48}H_{28}F_{14}IrN_5O_2P_2$ , 1126.927.

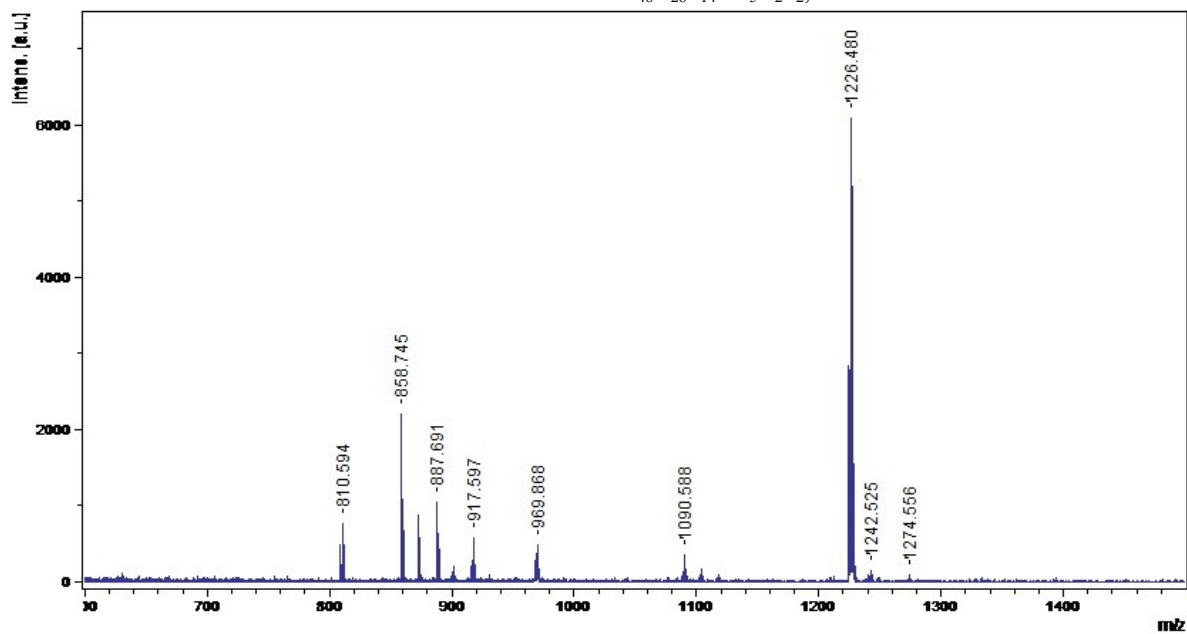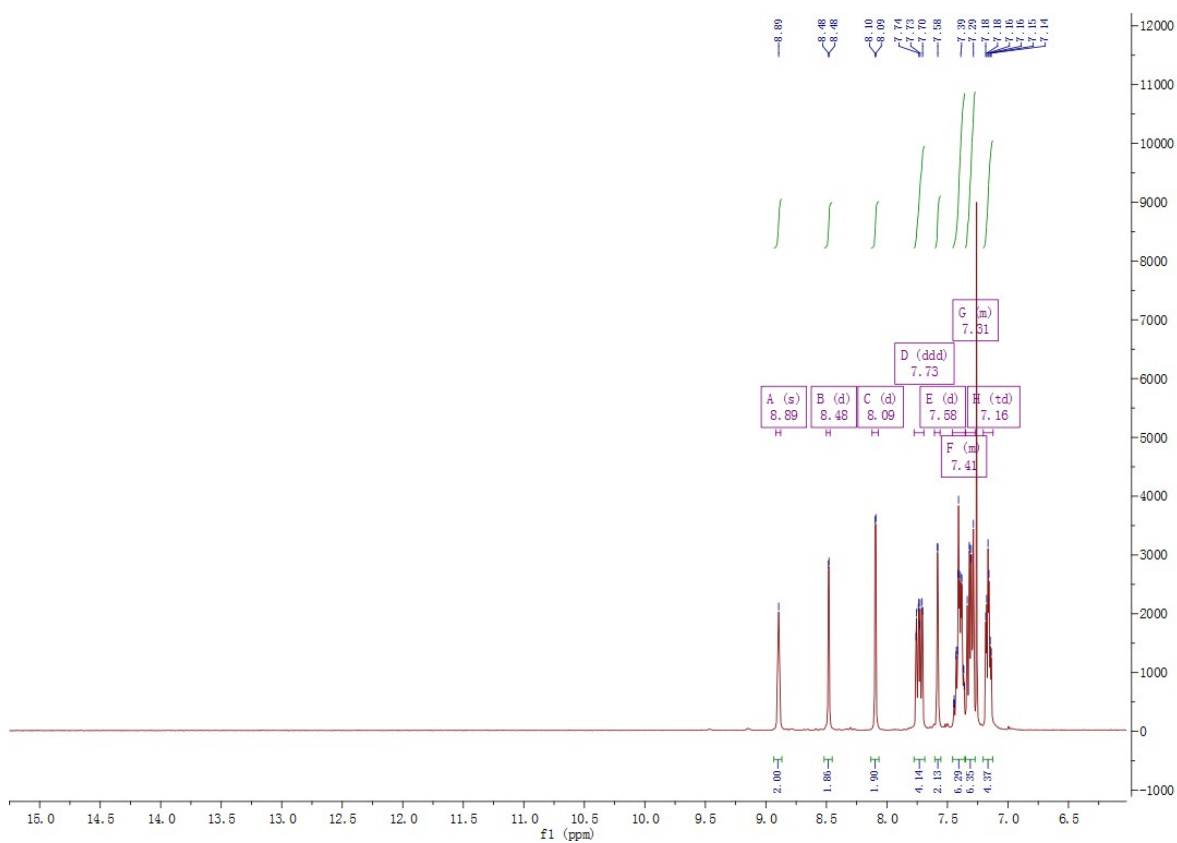

Fig. S9. The Mass Spectra and  $^1H$  NMR spectra of  $Ir(tfmphpm)_2(acac)$ ,  $Ir(f-$

**tfmphpm)<sub>2</sub>(acac), Ir(tfmphpm)<sub>2</sub>(tpip), Ir(f-tfmphpm)<sub>2</sub>(tpip).****Table S1.** Crystallographic data of **Ir(f-tfmphpm)<sub>2</sub>(acac), Ir(tfmphpm)<sub>2</sub>(tpip)** and **Ir(f-tfmphpm)<sub>2</sub>(tpip).**

|                                                                                                                                     | <b>Ir(tfmphpm)<sub>2</sub>(acac)</b>                                            | <b>Ir(tfmphpm)<sub>2</sub>(tpip)</b>                                                           | <b>Ir(f-tfmphpm)<sub>2</sub>(tpip)</b>                                                         |
|-------------------------------------------------------------------------------------------------------------------------------------|---------------------------------------------------------------------------------|------------------------------------------------------------------------------------------------|------------------------------------------------------------------------------------------------|
| Formula                                                                                                                             | C <sub>29</sub> H <sub>15</sub> F <sub>14</sub> IrN <sub>4</sub> O <sub>2</sub> | C <sub>48</sub> H <sub>28</sub> F <sub>12</sub> IrN <sub>5</sub> O <sub>2</sub> P <sub>2</sub> | C <sub>48</sub> H <sub>28</sub> F <sub>14</sub> IrN <sub>5</sub> O <sub>2</sub> P <sub>2</sub> |
| FW                                                                                                                                  | 909.90                                                                          | 1190.93                                                                                        | 1226.92                                                                                        |
| T (K)                                                                                                                               | 296(2)                                                                          | 296(2)                                                                                         | 296(2)                                                                                         |
| Wavelength (Å)                                                                                                                      | 0.71073                                                                         | 0.71073                                                                                        | 0.71073                                                                                        |
| Crystal system                                                                                                                      | monoclinic                                                                      | Triclinic                                                                                      | Monoclinic                                                                                     |
| Space group                                                                                                                         | C 1 2/c 1                                                                       | P -1                                                                                           | P2(1)/c                                                                                        |
| <i>a</i> (Å)                                                                                                                        | 19.7352(17)                                                                     | 10.713(7)                                                                                      | 10.7026(8)                                                                                     |
| <i>b</i> (Å)                                                                                                                        | 10.5902(10)                                                                     | 11.791(3)                                                                                      | 23.3672(19)                                                                                    |
| <i>c</i> (Å)                                                                                                                        | 16.4426(15)                                                                     | 18.760(5)                                                                                      | 18.9711(14)                                                                                    |
| <i>α</i> (deg)                                                                                                                      | 90                                                                              | 80.084(5)                                                                                      | 90                                                                                             |
| <i>β</i> (deg)                                                                                                                      | 117.554                                                                         | 84.606(5)                                                                                      | 100.879                                                                                        |
| <i>γ</i> (deg)                                                                                                                      | 90                                                                              | 87.756(5)                                                                                      | 90                                                                                             |
| <i>V</i> (Å <sup>3</sup> )                                                                                                          | 3046.7(5)                                                                       | 2323.3(11)                                                                                     | 4659.2(6)                                                                                      |
| <i>Z</i>                                                                                                                            | 4                                                                               | 2                                                                                              | 4                                                                                              |
| $\rho_{\text{calcd}}$ (mg/cm <sup>3</sup> )                                                                                         | 1.983                                                                           | 1.703                                                                                          | 1.749                                                                                          |
| $\mu$ (Mo K $\alpha$ ) (mm <sup>-1</sup> )                                                                                          | 4.503                                                                           | 3.036                                                                                          | 3.037                                                                                          |
| <i>F</i> (000)                                                                                                                      | 1738.7                                                                          | 1168.0                                                                                         | 2400.0                                                                                         |
| Reflns collected                                                                                                                    | 10124                                                                           | 12809                                                                                          | 39465                                                                                          |
| Unique                                                                                                                              | 3519                                                                            | 8051                                                                                           | 10660                                                                                          |
| Data/restraints/params                                                                                                              | 3519 / 6 / 258                                                                  | 8051 / 8 / 631                                                                                 | 10660 / 6 / 649                                                                                |
| GOF on <i>F</i> <sup>2</sup>                                                                                                        | 1.034                                                                           | 1.007                                                                                          | 1.201                                                                                          |
| <i>R</i> <sub><i>I</i></sub> <sup><i>a</i></sup> , <i>wR</i> <sub>2</sub> <sup><i>b</i></sup> [ <i>I</i> > 2 $\sigma$ ( <i>I</i> )] | 0.0221, 0.0483                                                                  | 0.0737, 0.1996                                                                                 | 0.0701, 0.1778                                                                                 |
| <i>R</i> <sub><i>I</i></sub> <sup><i>a</i></sup> , <i>wR</i> <sub>2</sub> <sup><i>b</i></sup> (all data)                            | 0.0263, 0.0503                                                                  | 0.0950, 0.2220                                                                                 | 0.0801, 0.1816                                                                                 |
| CCDC NO                                                                                                                             | 1828771                                                                         | 1828766                                                                                        | 1584888                                                                                        |

$$R_1^a = \frac{\sum ||F_o| - |F_c||}{\sum F_o}, \quad wR_2^b = \left[ \frac{\sum w(F_o^2 - F_c^2)^2}{\sum w(F_o^2)} \right]^{1/2}$$

**Table S2a** The selected bond lengths and angles of **Ir(f-tfmphm)<sub>2</sub>(acac)**.

| Selected bonds Å    |            |                   |          |             |          |
|---------------------|------------|-------------------|----------|-------------|----------|
| F(7A)-C(15)         | 1.251(7)   | N(2)-C(7)         | 1.336(5) | C(10)-H(10) | 0.93     |
| Ir(1)-N(1)          | 2.043(3)   | C(9)-C(8)         | 1.414(5) | C(5)-C(6)   | 1.365(7) |
| Ir(1)-N(1)#1        | 2.043(3)   | C(9)-C(11)        | 1.418(5) | C(6)-H(6)   | 0.93     |
| Ir(1)-C(9)          | 2.049(3)   | F(4)-C(14)        | 1.339(5) | C(12)-C(15) | 1.502(6) |
| Ir(1)-C(9)#1        | 2.049(3)   | C(4)-C(5)         | 1.367(6) | F(5)-C(15)  | 1.283(8) |
| Ir(1)-O(1)#1        | 2.112(3)   | C(4)-H(4)         | 0.93     | C(3)-C(2)   | 1.389(6) |
| Ir(1)-O(1)          | 2.112(3)   | C(11)-C(13)       | 1.389(5) | C(3)-C(1)   | 1.515(7) |
| O(1)-C(3)           | 1.272(5)   | C(11)-C(14)       | 1.497(6) | F(6)-C(15)  | 1.269(9) |
| F(1)-C(5)           | 1.343(5)   | C(13)-C(12)       | 1.381(7) | C(1)-H(1A)  | 0.96     |
| N(1)-C(4)           | 1.341(5)   | C(13)-H(13)       | 0.93     | C(1)-H(1B)  | 0.96     |
| N(1)-C(7)           | 1.347(5)   | C(7)-C(8)         | 1.458(5) | C(1)-H(1C)  | 0.96     |
| F(2)-C(14)          | 1.328(6)   | C(10)-C(12)       | 1.368(7) | C(2)-C(3)#1 | 1.389(6) |
| F(3)-C(14)          | 1.340(6)   | C(10)-C(8)        | 1.395(5) | C(2)-H(2)   | 0.93     |
| N(2)-C(6)           | 1.331(6)   |                   |          |             |          |
| Selected angles °   |            |                   |          |             |          |
| N(1)-Ir(1)-N(1)#1   | 171.97(16) | C(8)-C(10)-H(10)  | 120.2    |             |          |
| N(1)-Ir(1)-C(9)     | 81.18(13)  | F(1)-C(5)-C(6)    | 120.2(4) |             |          |
| N(1)#1-Ir(1)-C(9)   | 104.35(13) | F(1)-C(5)-C(4)    | 119.6(4) |             |          |
| N(1)-Ir(1)-C(9)#1   | 104.35(13) | C(6)-C(5)-C(4)    | 120.2(4) |             |          |
| N(1)#1-Ir(1)-C(9)#1 | 81.18(13)  | C(10)-C(8)-C(9)   | 123.8(4) |             |          |
| C(9)-Ir(1)-C(9)#1   | 95.13(19)  | C(10)-C(8)-C(7)   | 118.9(3) |             |          |
| N(1)-Ir(1)-O(1)#1   | 84.39(11)  | C(9)-C(8)-C(7)    | 117.3(3) |             |          |
| N(1)#1-Ir(1)-O(1)#1 | 89.94(11)  | N(2)-C(6)-C(5)    | 120.9(4) |             |          |
| C(9)-Ir(1)-O(1)#1   | 87.99(13)  | N(2)-C(6)-H(6)    | 119.5    |             |          |
| C(9)#1-Ir(1)-O(1)#1 | 171.06(12) | C(5)-C(6)-H(6)    | 119.5    |             |          |
| N(1)-Ir(1)-O(1)     | 89.94(11)  | C(10)-C(12)-C(13) | 119.1(4) |             |          |
| N(1)#1-Ir(1)-O(1)   | 84.39(11)  | C(10)-C(12)-C(15) | 120.2(5) |             |          |
| C(9)-Ir(1)-O(1)     | 171.06(12) | C(13)-C(12)-C(15) | 120.7(5) |             |          |
| C(9)#1-Ir(1)-O(1)   | 87.99(13)  | O(1)-C(3)-C(2)    | 126.4(5) |             |          |
| O(1)#1-Ir(1)-O(1)   | 90.18(17)  | O(1)-C(3)-C(1)    | 114.4(5) |             |          |
| C(3)-O(1)-Ir(1)     | 123.9(3)   | C(2)-C(3)-C(1)    | 119.2(5) |             |          |
| C(4)-N(1)-C(7)      | 118.3(3)   | F(2)-C(14)-F(4)   | 105.6(4) |             |          |
| C(4)-N(1)-Ir(1)     | 125.8(3)   | F(2)-C(14)-F(3)   | 106.0(4) |             |          |
| C(7)-N(1)-Ir(1)     | 115.3(2)   | F(4)-C(14)-F(3)   | 106.4(4) |             |          |
| C(6)-N(2)-C(7)      | 117.2(4)   | F(2)-C(14)-C(11)  | 113.5(4) |             |          |
| C(8)-C(9)-C(11)     | 114.2(3)   | F(4)-C(14)-C(11)  | 112.5(4) |             |          |
| C(8)-C(9)-Ir(1)     | 111.1(3)   | F(3)-C(14)-C(11)  | 112.3(4) |             |          |
| C(11)-C(9)-Ir(1)    | 134.7(3)   | F(7A)-C(15)-F(6)  | 106.5(7) |             |          |
| N(1)-C(4)-C(5)      | 119.1(4)   | F(7A)-C(15)-F(5)  | 107.6(7) |             |          |
| N(1)-C(4)-H(4)      | 120.5      | F(6)-C(15)-F(5)   | 100.7(6) |             |          |
| C(5)-C(4)-H(4)      | 120.5      | F(7A)-C(15)-C(12) | 114.1(5) |             |          |
| C(13)-C(11)-C(9)    | 121.7(4)   | F(6)-C(15)-C(12)  | 112.4(6) |             |          |
| C(13)-C(11)-C(14)   | 116.0(4)   | F(5)-C(15)-C(12)  | 114.4(5) |             |          |
| C(9)-C(11)-C(14)    | 122.3(3)   | C(3)-C(1)-H(1A)   | 109.5    |             |          |
| C(12)-C(13)-C(11)   | 121.6(4)   | C(3)-C(1)-H(1B)   | 109.5    |             |          |
| C(12)-C(13)-H(13)   | 119.2      | H(1A)-C(1)-H(1B)  | 109.5    |             |          |
| C(11)-C(13)-H(13)   | 119.2      | C(3)-C(1)-H(1C)   | 109.5    |             |          |
| N(2)-C(7)-N(1)      | 124.3(4)   | H(1A)-C(1)-H(1C)  | 109.5    |             |          |
| N(2)-C(7)-C(8)      | 121.4(3)   | H(1B)-C(1)-H(1C)  | 109.5    |             |          |
| N(1)-C(7)-C(8)      | 114.3(3)   | C(3)#1-C(2)-C(3)  | 129.0(6) |             |          |
| C(12)-C(10)-C(8)    | 119.6(4)   | C(3)#1-C(2)-H(2)  | 115.5    |             |          |
| C(12)-C(10)-H(10)   | 120.2      | C(3)-C(2)-H(2)    | 115.5    |             |          |

**Table S2b** The selected bond lengths and angles of **Ir(tfmphm)<sub>2</sub>(tpip)**.

| Selected bonds Å |          |             |          |              |           |
|------------------|----------|-------------|----------|--------------|-----------|
| Ir(1)-C(63)      | 2.004(5) | C(15)-C(46) | 1.495(7) | C(51)-C(221) | 1.388(7)  |
| Ir(1)-C(170)     | 2.030(6) | C(16)-C(54) | 1.329(9) | C(51)-H(51)  | 0.93      |
| Ir(1)-N(9)       | 2.045(4) | C(16)-C(21) | 1.429(8) | C(54)-C(150) | 1.416(10) |



|                         |            |                    |           |               |           |
|-------------------------|------------|--------------------|-----------|---------------|-----------|
| Ir(1)-N(6)              | 2.054(4)   | C(18)-C(40)        | 1.398(8)  | C(54)-H(54)   | 0.93      |
| Ir(1)-O(3)              | 2.169(3)   | C(18)-C(59)        | 1.409(9)  | C(56)-H(56)   | 0.93      |
| Ir(1)-O(4)              | 2.196(3)   | C(21)-C(61)        | 1.348(9)  | C(57)-H(57)   | 0.93      |
| P(3)-O(4)               | 1.536(4)   | C(21)-H(21)        | 0.93      | C(59)-H(59)   | 0.93      |
| P(3)-N(10)              | 1.592(4)   | C(25)-C(36)        | 1.466(7)  | C(61)-C(151)  | 1.432(10) |
| P(3)-C(219)             | 1.784(6)   | C(29)-C(32)        | 1.389(7)  | C(61)-H(61)   | 0.93      |
| P(3)-C(18)              | 1.796(5)   | C(29)-C(47)        | 1.397(8)  | C(62)-C(167)  | 1.404(10) |
| P(4)-O(3)               | 1.528(4)   | C(29)-H(29)        | 0.93      | C(62)-H(62)   | 0.93      |
| P(4)-N(10)              | 1.606(4)   | C(30)-C(56)        | 1.392(9)  | C(133)-H(133) | 0.93      |
| P(4)-C(30)              | 1.811(5)   | C(30)-C(37)        | 1.393(8)  | C(165)-C(168) | 1.408(7)  |
| P(4)-C(16)              | 1.812(6)   | C(32)-C(63)        | 1.423(7)  | C(165)-H(165) | 0.93      |
| F(13)-C(225)            | 1.297(7)   | C(36)-C(165)       | 1.322(7)  | C(167)-H(167) | 0.93      |
| F(14)-C(225)            | 1.325(6)   | C(36)-C(170)       | 1.405(7)  | C(168)-C(222) | 1.416(6)  |
| F(15)-C(225)            | 1.284(8)   | C(37)-C(50)        | 1.369(9)  | C(168)-C(225) | 1.500(7)  |
| F(16)-C(207)            | 1.318(7)   | C(37)-H(37)        | 0.93      | C(170)-C(210) | 1.402(8)  |
| F(17)-C(207)            | 1.310(7)   | C(38)-C(49)        | 1.368(7)  | C(205)-C(217) | 1.355(10) |
| F(18)-C(207)            | 1.350(8)   | C(38)-H(38)        | 0.93      | C(205)-C(206) | 1.437(11) |
| F(19)-C(46)             | 1.325(7)   | C(39)-C(56)        | 1.339(8)  | C(205)-H(205) | 0.93      |
| F(20)-C(46)             | 1.339(6)   | C(39)-C(44)        | 1.393(10) | C(206)-C(215) | 1.376(12) |
| F(21)-C(46)             | 1.378(7)   | C(39)-H(39)        | 0.93      | C(206)-H(206) | 0.93      |
| F(22)-C(226)            | 1.298(9)   | C(40)-C(62)        | 1.361(8)  | C(207)-C(210) | 1.524(7)  |
| F(23)-C(226)            | 1.265(9)   | C(40)-H(40)        | 0.93      | C(210)-C(222) | 1.401(7)  |
| F(24)-C(226)            | 1.287(8)   | C(41)-C(167)       | 1.384(11) | C(215)-C(216) | 1.368(10) |
| N(6)-C(38)              | 1.336(7)   | C(41)-C(59)        | 1.399(10) | C(215)-H(215) | 0.93      |
| N(6)-C(25)              | 1.383(6)   | C(41)-H(41)        | 0.93      | C(216)-C(219) | 1.430(8)  |
| N(7)-C(25)              | 1.354(6)   | C(44)-C(50)        | 1.370(11) | C(216)-H(216) | 0.93      |
| N(7)-C(57)              | 1.367(8)   | C(44)-H(44)        | 0.93      | C(217)-C(219) | 1.388(9)  |
| N(8)-C(13)              | 1.328(6)   | C(47)-C(133)       | 1.396(8)  | C(217)-H(217) | 0.93      |
| N(8)-C(48)              | 1.371(8)   | C(47)-C(226)       | 1.512(8)  | C(221)-H(221) | 0.93      |
| N(9)-C(221)             | 1.323(7)   | C(48)-C(51)        | 1.340(8)  | C(222)-H(222) | 0.93      |
| N(9)-C(13)              | 1.407(6)   | C(48)-H(48)        | 0.93      | C(151)-C(150) | 1.393(10) |
| C(13)-C(32)             | 1.440(7)   | C(49)-C(57)        | 1.390(9)  | C(151)-H(151) | 0.93      |
| C(15)-C(133)            | 1.427(7)   | C(49)-H(49)        | 0.93      | C(150)-H(150) | 0.93      |
| C(15)-C(63)             | 1.437(7)   | C(50)-H(50)        | 0.93      |               |           |
| <b>Selected angles°</b> |            |                    |           |               |           |
| C(63)-Ir(1)-C(170)      | 100.2(2)   | N(8)-C(48)-H(48)   | 118.2     |               |           |
| C(63)-Ir(1)-N(9)        | 81.50(18)  | C(38)-C(49)-C(57)  | 117.9(5)  |               |           |
| C(170)-Ir(1)-N(9)       | 102.94(18) | C(38)-C(49)-H(49)  | 121.1     |               |           |
| C(63)-Ir(1)-N(6)        | 103.53(18) | C(57)-C(49)-H(49)  | 121.1     |               |           |
| C(170)-Ir(1)-N(6)       | 82.07(18)  | C(37)-C(50)-C(44)  | 120.3(6)  |               |           |
| N(9)-Ir(1)-N(6)         | 172.31(17) | C(37)-C(50)-H(50)  | 119.9     |               |           |
| C(63)-Ir(1)-O(3)        | 173.42(17) | C(44)-C(50)-H(50)  | 119.9     |               |           |
| C(170)-Ir(1)-O(3)       | 85.14(18)  | C(48)-C(51)-C(221) | 118.2(5)  |               |           |
| N(9)-Ir(1)-O(3)         | 93.67(15)  | C(48)-C(51)-H(51)  | 120.9     |               |           |
| N(6)-Ir(1)-O(3)         | 80.84(15)  | C(221)-C(51)-H(51) | 120.9     |               |           |
| C(63)-Ir(1)-O(4)        | 87.55(16)  | C(16)-C(54)-C(150) | 121.2(6)  |               |           |
| C(170)-Ir(1)-O(4)       | 167.90(16) | C(16)-C(54)-H(54)  | 119.4     |               |           |
| N(9)-Ir(1)-O(4)         | 87.28(14)  | C(150)-C(54)-H(54) | 119.4     |               |           |
| N(6)-Ir(1)-O(4)         | 87.13(14)  | C(39)-C(56)-C(30)  | 123.3(6)  |               |           |
| O(3)-Ir(1)-O(4)         | 87.76(12)  | C(39)-C(56)-H(56)  | 118.3     |               |           |
| O(4)-P(3)-N(10)         | 117.9(2)   | C(30)-C(56)-H(56)  | 118.3     |               |           |
| O(4)-P(3)-C(219)        | 105.9(2)   | N(7)-C(57)-C(49)   | 123.2(5)  |               |           |
| N(10)-P(3)-C(219)       | 110.0(2)   | N(7)-C(57)-H(57)   | 118.4     |               |           |
| O(4)-P(3)-C(18)         | 110.3(2)   | C(49)-C(57)-H(57)  | 118.4     |               |           |
| N(10)-P(3)-C(18)        | 108.4(2)   | C(41)-C(59)-C(18)  | 118.8(7)  |               |           |
| C(219)-P(3)-C(18)       | 103.3(2)   | C(41)-C(59)-H(59)  | 120.6     |               |           |
| O(3)-P(4)-N(10)         | 118.3(2)   | C(18)-C(59)-H(59)  | 120.6     |               |           |
| O(3)-P(4)-C(30)         | 107.4(2)   | C(21)-C(61)-C(151) | 120.8(6)  |               |           |
| N(10)-P(4)-C(30)        | 109.8(2)   | C(21)-C(61)-H(61)  | 119.6     |               |           |
| O(3)-P(4)-C(16)         | 107.2(2)   | C(151)-C(61)-H(61) | 119.6     |               |           |
| N(10)-P(4)-C(16)        | 108.7(2)   | C(40)-C(62)-C(167) | 120.1(6)  |               |           |
| C(30)-P(4)-C(16)        | 104.7(2)   | C(40)-C(62)-H(62)  | 120       |               |           |
| P(4)-O(3)-Ir(1)         | 128.96(19) | C(167)-C(62)-H(62) | 120       |               |           |
| P(3)-O(4)-Ir(1)         | 126.69(19) | C(32)-C(63)-C(15)  | 114.5(4)  |               |           |
| C(38)-N(6)-C(25)        | 120.3(4)   | C(32)-C(63)-Ir(1)  | 111.4(4)  |               |           |

|                     |          |                      |          |
|---------------------|----------|----------------------|----------|
| C(38)-N(6)-Ir(1)    | 126.9(3) | C(15)-C(63)-Ir(1)    | 134.1(3) |
| C(25)-N(6)-Ir(1)    | 110.3(3) | C(47)-C(133)-C(15)   | 120.3(5) |
| C(25)-N(7)-C(57)    | 116.0(5) | C(47)-C(133)-H(133)  | 119.9    |
| C(13)-N(8)-C(48)    | 116.4(4) | C(15)-C(133)-H(133)  | 119.9    |
| C(221)-N(9)-C(13)   | 118.3(4) | C(36)-C(165)-C(168)  | 120.3(4) |
| C(221)-N(9)-Ir(1)   | 127.4(3) | C(36)-C(165)-H(165)  | 119.9    |
| C(13)-N(9)-Ir(1)    | 112.2(3) | C(168)-C(165)-H(165) | 119.9    |
| P(3)-N(10)-P(4)     | 126.7(3) | C(41)-C(167)-C(62)   | 119.2(6) |
| N(8)-C(13)-N(9)     | 122.8(4) | C(41)-C(167)-H(167)  | 120.4    |
| N(8)-C(13)-C(32)    | 124.2(4) | C(62)-C(167)-H(167)  | 120.4    |
| N(9)-C(13)-C(32)    | 112.9(4) | C(165)-C(168)-C(222) | 116.9(4) |
| C(133)-C(15)-C(63)  | 120.8(5) | C(165)-C(168)-C(225) | 123.8(4) |
| C(133)-C(15)-C(46)  | 115.2(5) | C(222)-C(168)-C(225) | 119.3(4) |
| C(63)-C(15)-C(46)   | 123.8(5) | C(210)-C(170)-C(36)  | 113.9(5) |
| C(54)-C(16)-C(21)   | 120.2(6) | C(210)-C(170)-Ir(1)  | 133.8(4) |
| C(54)-C(16)-P(4)    | 118.0(5) | C(36)-C(170)-Ir(1)   | 112.2(4) |
| C(21)-C(16)-P(4)    | 121.5(4) | C(217)-C(205)-C(206) | 118.6(7) |
| C(40)-C(18)-C(59)   | 119.0(5) | C(217)-C(205)-H(205) | 120.7    |
| C(40)-C(18)-P(3)    | 123.2(4) | C(206)-C(205)-H(205) | 120.7    |
| C(59)-C(18)-P(3)    | 117.7(5) | C(215)-C(206)-C(205) | 119.5(7) |
| C(61)-C(21)-C(16)   | 119.9(6) | C(215)-C(206)-H(206) | 120.3    |
| C(61)-C(21)-H(21)   | 120      | C(205)-C(206)-H(206) | 120.3    |
| C(16)-C(21)-H(21)   | 120      | F(17)-C(207)-F(16)   | 109.1(5) |
| N(7)-C(25)-N(6)     | 122.2(4) | F(17)-C(207)-F(18)   | 105.1(5) |
| N(7)-C(25)-C(36)    | 120.7(4) | F(16)-C(207)-F(18)   | 104.3(5) |
| N(6)-C(25)-C(36)    | 117.1(4) | F(17)-C(207)-C(210)  | 111.8(5) |
| C(32)-C(29)-C(47)   | 118.1(5) | F(16)-C(207)-C(210)  | 113.4(5) |
| C(32)-C(29)-H(29)   | 120.9    | F(18)-C(207)-C(210)  | 112.6(5) |
| C(47)-C(29)-H(29)   | 120.9    | C(222)-C(210)-C(170) | 121.9(4) |
| C(56)-C(30)-C(37)   | 115.9(5) | C(222)-C(210)-C(207) | 113.3(5) |
| C(56)-C(30)-P(4)    | 122.8(4) | C(170)-C(210)-C(207) | 124.6(5) |
| C(37)-C(30)-P(4)    | 121.3(4) | C(216)-C(215)-C(206) | 119.0(8) |
| C(29)-C(32)-C(63)   | 125.1(5) | C(216)-C(215)-H(215) | 120.5    |
| C(29)-C(32)-C(13)   | 117.6(4) | C(206)-C(215)-H(215) | 120.5    |
| C(63)-C(32)-C(13)   | 117.3(4) | C(215)-C(216)-C(219) | 123.8(7) |
| C(165)-C(36)-C(170) | 126.1(5) | C(215)-C(216)-H(216) | 118.1    |
| C(165)-C(36)-C(25)  | 119.1(4) | C(219)-C(216)-H(216) | 118.1    |
| C(170)-C(36)-C(25)  | 114.5(4) | C(205)-C(217)-C(219) | 124.5(7) |
| C(50)-C(37)-C(30)   | 121.5(6) | C(205)-C(217)-H(217) | 117.7    |
| C(50)-C(37)-H(37)   | 119.2    | C(219)-C(217)-H(217) | 117.7    |
| C(30)-C(37)-H(37)   | 119.2    | C(217)-C(219)-C(216) | 114.3(5) |
| N(6)-C(38)-C(49)    | 120.2(5) | C(217)-C(219)-P(3)   | 122.3(5) |
| N(6)-C(38)-H(38)    | 119.9    | C(216)-C(219)-P(3)   | 123.2(5) |
| C(49)-C(38)-H(38)   | 119.9    | N(9)-C(221)-C(51)    | 120.8(5) |
| C(56)-C(39)-C(44)   | 119.4(7) | N(9)-C(221)-H(221)   | 119.6    |
| C(56)-C(39)-H(39)   | 120.3    | C(51)-C(221)-H(221)  | 119.6    |
| C(44)-C(39)-H(39)   | 120.3    | C(210)-C(222)-C(168) | 120.4(4) |
| C(62)-C(40)-C(18)   | 121.6(5) | C(210)-C(222)-H(222) | 119.8    |
| C(62)-C(40)-H(40)   | 119.2    | C(168)-C(222)-H(222) | 119.8    |
| C(18)-C(40)-H(40)   | 119.2    | F(15)-C(225)-F(13)   | 108.5(5) |
| C(167)-C(41)-C(59)  | 121.3(7) | F(15)-C(225)-F(14)   | 106.2(5) |
| C(167)-C(41)-H(41)  | 119.4    | F(13)-C(225)-F(14)   | 103.2(4) |
| C(59)-C(41)-H(41)   | 119.4    | F(15)-C(225)-C(168)  | 111.7(5) |
| C(50)-C(44)-C(39)   | 118.8(6) | F(13)-C(225)-C(168)  | 113.2(5) |
| C(50)-C(44)-H(44)   | 120.6    | F(14)-C(225)-C(168)  | 113.5(5) |
| C(39)-C(44)-H(44)   | 120.6    | F(23)-C(226)-F(24)   | 104.3(6) |
| F(19)-C(46)-F(20)   | 105.8(5) | F(23)-C(226)-F(22)   | 105.1(7) |
| F(19)-C(46)-F(21)   | 106.2(4) | F(24)-C(226)-F(22)   | 104.4(6) |
| F(20)-C(46)-F(21)   | 107.7(5) | F(23)-C(226)-C(47)   | 115.3(6) |
| F(19)-C(46)-C(15)   | 112.9(5) | F(24)-C(226)-C(47)   | 114.3(6) |
| F(20)-C(46)-C(15)   | 113.0(4) | F(22)-C(226)-C(47)   | 112.3(6) |
| F(21)-C(46)-C(15)   | 110.9(5) | C(150)-C(151)-C(61)  | 118.2(6) |
| C(133)-C(47)-C(29)  | 120.7(5) | C(150)-C(151)-H(151) | 120.9    |
| C(133)-C(47)-C(226) | 119.3(5) | C(61)-C(151)-H(151)  | 120.9    |
| C(29)-C(47)-C(226)  | 120.0(5) | C(151)-C(150)-C(54)  | 119.7(6) |

|                   |          |                      |       |
|-------------------|----------|----------------------|-------|
| C(51)-C(48)-N(8)  | 123.5(5) | C(151)-C(150)-H(150) | 120.2 |
| C(51)-C(48)-H(48) | 118.2    | C(54)-C(150)-H(150)  | 120.2 |

**Table S2c** The selected bond lengths and angles of **Ir(f-tfmphpm)<sub>2</sub>(tpip)**.

| Selected bonds Å  |           |                   |           |             |           |
|-------------------|-----------|-------------------|-----------|-------------|-----------|
| C(42)-C(36)       | 1.35(2)   | C(3)-C(17)        | 1.381(16) | C(24)-C(35) | 1.375(15) |
| C(42)-C(47)       | 1.39(2)   | C(3)-H(3)         | 0.93      | C(24)-C(27) | 1.388(16) |
| C(42)-H(42)       | 0.93      | C(4)-C(12)        | 1.410(13) | C(25)-C(41) | 1.377(17) |
| Ir(1)-C(8)        | 2.014(10) | F(10)-C(31)       | 1.341(14) | C(25)-H(25) | 0.93      |
| Ir(1)-C(4)        | 2.017(9)  | C(5)-N(4)         | 1.321(17) | C(26)-H(26) | 0.93      |
| Ir(1)-N(1)        | 2.019(8)  | C(5)-C(31)        | 1.368(17) | C(27)-C(44) | 1.392(16) |
| Ir(1)-N(3)        | 2.023(8)  | C(5)-H(5)         | 0.93      | C(27)-H(27) | 0.93      |
| Ir(1)-O(2)        | 2.159(7)  | C(6)-C(18)        | 1.398(14) | C(28)-F(1)  | 1.334(15) |
| Ir(1)-O(1)        | 2.162(6)  | C(6)-C(7)         | 1.399(14) | C(28)-C(29) | 1.494(15) |
| P(1)-O(1)         | 1.523(6)  | C(6)-H(6)         | 0.93      | C(29)-C(30) | 1.382(17) |
| P(1)-N(5)         | 1.594(9)  | C(8)-C(20)        | 1.419(15) | C(30)-H(30) | 0.93      |
| P(1)-C(17)        | 1.801(11) | C(8)-C(9)         | 1.426(15) | C(31)-C(39) | 1.371(15) |
| P(1)-C(7)         | 1.807(10) | C(9)-C(13)        | 1.395(13) | C(32)-H(32) | 0.93      |
| P(2)-O(2)         | 1.518(8)  | C(9)-C(16)        | 1.457(15) | C(33)-C(37) | 1.363(19) |
| P(2)-N(5)         | 1.585(9)  | C(10)-C(21)       | 1.380(15) | C(33)-C(44) | 1.397(18) |
| P(2)-C(19)        | 1.806(11) | C(10)-C(12)       | 1.400(14) | C(33)-H(33) | 0.93      |
| P(2)-C(24)        | 1.814(10) | C(10)-H(10)       | 0.93      | C(34)-H(34) | 0.93      |
| N(1)-C(26)        | 1.351(13) | C(11)-C(34)       | 1.381(17) | C(35)-C(37) | 1.402(17) |
| N(1)-C(15)        | 1.356(12) | C(11)-H(11)       | 0.93      | C(35)-H(35) | 0.93      |
| F(6)-C(22)        | 1.342(12) | F(3)-C(28)        | 1.312(14) | C(36)-H(36) | 0.93      |
| N(3)-C(39)        | 1.341(13) | C(12)-C(38)       | 1.508(14) | C(37)-H(37) | 0.93      |
| N(3)-C(16)        | 1.363(12) | C(13)-C(29)       | 1.345(17) | C(39)-H(39) | 0.93      |
| F(5)-C(22)        | 1.339(13) | C(13)-H(13)       | 0.93      | C(40)-C(41) | 1.35(2)   |
| F(11)-C(14)       | 1.333(12) | C(14)-C(26)       | 1.371(15) | C(40)-C(46) | 1.41(2)   |
| F(7)-C(38)        | 1.358(14) | C(14)-C(23)       | 1.372(16) | C(40)-H(40) | 0.93      |
| F(9)-C(38)        | 1.342(15) | N(4)-C(16)        | 1.333(14) | C(41)-H(41) | 0.93      |
| F(8)-C(38)        | 1.350(12) | F(2)-C(28)        | 1.326(17) | F(13)-C(48) | 1.340(12) |
| F(4)-C(22)        | 1.362(12) | C(17)-C(45)       | 1.382(18) | F(14)-C(48) | 1.335(12) |
| N(2)-C(15)        | 1.333(12) | C(18)-C(34)       | 1.359(17) | F(12)-C(48) | 1.344(12) |
| N(2)-C(23)        | 1.348(14) | C(18)-H(18)       | 0.93      | C(43)-C(46) | 1.454(17) |
| C(1)-C(7)         | 1.379(14) | C(19)-C(43)       | 1.369(17) | C(43)-H(43) | 0.93      |
| C(1)-C(11)        | 1.390(14) | C(19)-C(25)       | 1.414(15) | C(44)-H(44) | 0.93      |
| C(1)-H(1)         | 0.93      | C(20)-C(30)       | 1.390(14) | C(45)-C(47) | 1.39(2)   |
| C(2)-C(32)        | 1.370(13) | C(20)-C(22)       | 1.490(16) | C(45)-H(45) | 0.93      |
| C(2)-C(4)         | 1.431(13) | C(21)-C(32)       | 1.383(14) | C(46)-H(46) | 0.93      |
| C(2)-C(15)        | 1.465(13) | C(21)-C(48)       | 1.491(14) | C(47)-H(47) | 0.93      |
| C(3)-C(36)        | 1.365(18) | C(23)-H(23)       | 0.93      |             |           |
| Selected angles°  |           |                   |           |             |           |
| C(36)-C(42)-C(47) | 119.0(14) | C(30)-C(20)-C(8)  | 122.1(11) |             |           |
| C(36)-C(42)-H(42) | 120.5     | C(30)-C(20)-C(22) | 116.6(10) |             |           |
| C(47)-C(42)-H(42) | 120.5     | C(8)-C(20)-C(22)  | 121.2(9)  |             |           |
| C(8)-Ir(1)-C(4)   | 99.6(4)   | C(10)-C(21)-C(32) | 119.2(9)  |             |           |
| C(8)-Ir(1)-N(1)   | 104.7(4)  | C(10)-C(21)-C(48) | 118.2(9)  |             |           |
| C(4)-Ir(1)-N(1)   | 81.8(4)   | C(32)-C(21)-C(48) | 122.6(9)  |             |           |
| C(8)-Ir(1)-N(3)   | 81.4(4)   | F(5)-C(22)-F(6)   | 105.8(9)  |             |           |
| C(4)-Ir(1)-N(3)   | 103.3(4)  | F(5)-C(22)-F(4)   | 105.1(9)  |             |           |
| N(1)-Ir(1)-N(3)   | 171.5(3)  | F(6)-C(22)-F(4)   | 104.5(8)  |             |           |
| C(8)-Ir(1)-O(2)   | 87.8(3)   | F(5)-C(22)-C(20)  | 114.1(9)  |             |           |
| C(4)-Ir(1)-O(2)   | 168.9(3)  | F(6)-C(22)-C(20)  | 113.9(9)  |             |           |
| N(1)-Ir(1)-O(2)   | 88.3(3)   | F(4)-C(22)-C(20)  | 112.5(9)  |             |           |
| N(3)-Ir(1)-O(2)   | 85.9(3)   | N(2)-C(23)-C(14)  | 120.8(10) |             |           |
| C(8)-Ir(1)-O(1)   | 172.1(4)  | N(2)-C(23)-H(23)  | 119.6     |             |           |
| C(4)-Ir(1)-O(1)   | 83.1(3)   | C(14)-C(23)-H(23) | 119.6     |             |           |
| N(1)-Ir(1)-O(1)   | 83.1(3)   | C(35)-C(24)-C(27) | 119.9(10) |             |           |
| N(3)-Ir(1)-O(1)   | 90.7(3)   | C(35)-C(24)-P(2)  | 119.8(9)  |             |           |
| O(2)-Ir(1)-O(1)   | 90.8(2)   | C(27)-C(24)-P(2)  | 120.2(8)  |             |           |
| O(1)-P(1)-N(5)    | 118.2(4)  | C(41)-C(25)-C(19) | 120.1(13) |             |           |
| O(1)-P(1)-C(17)   | 105.6(5)  | C(41)-C(25)-H(25) | 119.9     |             |           |
| N(5)-P(1)-C(17)   | 106.7(5)  | C(19)-C(25)-H(25) | 119.9     |             |           |
| O(1)-P(1)-C(7)    | 105.5(4)  | N(1)-C(26)-C(14)  | 119.5(10) |             |           |

|                   |           |                   |           |
|-------------------|-----------|-------------------|-----------|
| N(5)-P(1)-C(7)    | 111.8(5)  | N(1)-C(26)-H(26)  | 120.2     |
| C(17)-P(1)-C(7)   | 108.5(5)  | C(14)-C(26)-H(26) | 120.2     |
| O(2)-P(2)-N(5)    | 118.5(4)  | C(24)-C(27)-C(44) | 119.6(11) |
| O(2)-P(2)-C(19)   | 107.2(5)  | C(24)-C(27)-H(27) | 120.2     |
| N(5)-P(2)-C(19)   | 110.2(5)  | C(44)-C(27)-H(27) | 120.2     |
| O(2)-P(2)-C(24)   | 108.8(4)  | F(3)-C(28)-F(2)   | 106.1(11) |
| N(5)-P(2)-C(24)   | 107.2(5)  | F(3)-C(28)-F(1)   | 105.9(12) |
| C(19)-P(2)-C(24)  | 104.1(5)  | F(2)-C(28)-F(1)   | 104.7(12) |
| P(1)-O(1)-Ir(1)   | 128.4(4)  | F(3)-C(28)-C(29)  | 113.7(11) |
| C(26)-N(1)-C(15)  | 117.9(9)  | F(2)-C(28)-C(29)  | 113.8(11) |
| C(26)-N(1)-Ir(1)  | 126.8(7)  | F(1)-C(28)-C(29)  | 111.9(10) |
| C(15)-N(1)-Ir(1)  | 114.2(6)  | C(13)-C(29)-C(30) | 119.5(10) |
| C(39)-N(3)-C(16)  | 117.9(9)  | C(13)-C(29)-C(28) | 121.1(12) |
| C(39)-N(3)-Ir(1)  | 126.5(7)  | C(30)-C(29)-C(28) | 119.4(11) |
| C(16)-N(3)-Ir(1)  | 114.3(7)  | C(29)-C(30)-C(20) | 120.7(11) |
| C(15)-N(2)-C(23)  | 117.2(9)  | C(29)-C(30)-H(30) | 119.6     |
| C(7)-C(1)-C(11)   | 120.8(10) | C(20)-C(30)-H(30) | 119.6     |
| C(7)-C(1)-H(1)    | 119.6     | F(10)-C(31)-C(5)  | 121.2(11) |
| C(11)-C(1)-H(1)   | 119.6     | F(10)-C(31)-C(39) | 119.6(10) |
| C(32)-C(2)-C(4)   | 123.8(9)  | C(5)-C(31)-C(39)  | 119.2(11) |
| C(32)-C(2)-C(15)  | 120.7(9)  | C(2)-C(32)-C(21)  | 119.6(9)  |
| C(4)-C(2)-C(15)   | 115.5(8)  | C(2)-C(32)-H(32)  | 120.2     |
| C(36)-C(3)-C(17)  | 121.6(13) | C(21)-C(32)-H(32) | 120.2     |
| C(36)-C(3)-H(3)   | 119.2     | C(37)-C(33)-C(44) | 121.0(11) |
| C(17)-C(3)-H(3)   | 119.2     | C(37)-C(33)-H(33) | 119.5     |
| C(12)-C(4)-C(2)   | 114.5(8)  | C(44)-C(33)-H(33) | 119.5     |
| C(12)-C(4)-Ir(1)  | 134.3(7)  | C(18)-C(34)-C(11) | 120.7(10) |
| C(2)-C(4)-Ir(1)   | 110.8(7)  | C(18)-C(34)-H(34) | 119.6     |
| N(4)-C(5)-C(31)   | 121.7(11) | C(11)-C(34)-H(34) | 119.6     |
| N(4)-C(5)-H(5)    | 119.1     | C(24)-C(35)-C(37) | 120.9(12) |
| C(31)-C(5)-H(5)   | 119.1     | C(24)-C(35)-H(35) | 119.5     |
| C(18)-C(6)-C(7)   | 119.0(10) | C(37)-C(35)-H(35) | 119.5     |
| C(18)-C(6)-H(6)   | 120.5     | C(42)-C(36)-C(3)  | 120.8(14) |
| C(7)-C(6)-H(6)    | 120.5     | C(42)-C(36)-H(36) | 119.6     |
| C(1)-C(7)-C(6)    | 119.5(9)  | C(3)-C(36)-H(36)  | 119.6     |
| C(1)-C(7)-P(1)    | 120.4(8)  | C(33)-C(37)-C(35) | 119.0(11) |
| C(6)-C(7)-P(1)    | 120.0(8)  | C(33)-C(37)-H(37) | 120.5     |
| C(20)-C(8)-C(9)   | 114.2(9)  | C(35)-C(37)-H(37) | 120.5     |
| C(20)-C(8)-Ir(1)  | 134.7(8)  | F(9)-C(38)-F(8)   | 105.7(9)  |
| C(9)-C(8)-Ir(1)   | 111.0(7)  | F(9)-C(38)-F(7)   | 108.6(10) |
| C(13)-C(9)-C(8)   | 122.3(10) | F(8)-C(38)-F(7)   | 105.0(9)  |
| C(13)-C(9)-C(16)  | 121.3(10) | F(9)-C(38)-C(12)  | 113.5(9)  |
| C(8)-C(9)-C(16)   | 116.3(9)  | F(8)-C(38)-C(12)  | 112.2(9)  |
| C(21)-C(10)-C(12) | 121.3(9)  | F(7)-C(38)-C(12)  | 111.2(9)  |
| C(21)-C(10)-H(10) | 119.4     | N(3)-C(39)-C(31)  | 119.7(10) |
| C(12)-C(10)-H(10) | 119.4     | N(3)-C(39)-H(39)  | 120.1     |
| C(34)-C(11)-C(1)  | 119.2(11) | C(31)-C(39)-H(39) | 120.1     |
| C(34)-C(11)-H(11) | 120.4     | C(41)-C(40)-C(46) | 124.7(12) |
| C(1)-C(11)-H(11)  | 120.4     | C(41)-C(40)-H(40) | 117.6     |
| C(10)-C(12)-C(4)  | 121.3(9)  | C(46)-C(40)-H(40) | 117.6     |
| C(10)-C(12)-C(38) | 115.6(9)  | C(40)-C(41)-C(25) | 120.3(13) |
| C(4)-C(12)-C(38)  | 123.1(9)  | C(40)-C(41)-H(41) | 119.9     |
| C(29)-C(13)-C(9)  | 121.0(11) | C(25)-C(41)-H(41) | 119.9     |
| C(29)-C(13)-H(13) | 119.5     | P(2)-O(2)-Ir(1)   | 128.5(4)  |
| C(9)-C(13)-H(13)  | 119.5     | C(19)-C(43)-C(46) | 124.0(12) |
| F(11)-C(14)-C(26) | 120.2(10) | C(19)-C(43)-H(43) | 118       |
| F(11)-C(14)-C(23) | 119.9(10) | C(46)-C(43)-H(43) | 118       |
| C(26)-C(14)-C(23) | 119.9(10) | F(14)-C(48)-F(13) | 106.7(8)  |
| C(5)-N(4)-C(16)   | 117.6(10) | F(14)-C(48)-F(12) | 107.1(9)  |
| N(2)-C(15)-N(1)   | 124.6(9)  | F(13)-C(48)-F(12) | 106.5(9)  |
| N(2)-C(15)-C(2)   | 120.9(9)  | F(14)-C(48)-C(21) | 111.9(9)  |
| N(1)-C(15)-C(2)   | 114.5(8)  | F(13)-C(48)-C(21) | 112.1(8)  |
| N(4)-C(16)-N(3)   | 123.8(10) | F(12)-C(48)-C(21) | 112.3(8)  |
| N(4)-C(16)-C(9)   | 122.7(9)  | C(27)-C(44)-C(33) | 119.7(12) |
| N(3)-C(16)-C(9)   | 113.5(9)  | C(27)-C(44)-H(44) | 120.2     |

|                   |           |                   |           |
|-------------------|-----------|-------------------|-----------|
| P(2)-N(5)-P(1)    | 127.1(6)  | C(33)-C(44)-H(44) | 120.2     |
| C(3)-C(17)-C(45)  | 118.4(11) | C(17)-C(45)-C(47) | 119.4(14) |
| C(3)-C(17)-P(1)   | 120.6(9)  | C(17)-C(45)-H(45) | 120.3     |
| C(45)-C(17)-P(1)  | 120.6(9)  | C(47)-C(45)-H(45) | 120.3     |
| C(34)-C(18)-C(6)  | 120.7(11) | C(40)-C(46)-C(43) | 112.6(13) |
| C(34)-C(18)-H(18) | 119.7     | C(40)-C(46)-H(46) | 123.7     |
| C(6)-C(18)-H(18)  | 119.7     | C(43)-C(46)-H(46) | 123.7     |
| C(43)-C(19)-C(25) | 118.2(11) | C(42)-C(47)-C(45) | 120.6(16) |
| C(43)-C(19)-P(2)  | 122.7(9)  | C(42)-C(47)-H(47) | 119.7     |
| C(25)-C(19)-P(2)  | 119.1(9)  | C(45)-C(47)-H(47) | 119.7     |

## References

- 1 (a) D. P. Rillema, D. G. Taghdiri, D. S. Jones, C. D. Keller, L. A. Worl, T. J. Meyer and H. A. Levy, *Inorg. Chem.*, 1987, **26**, 578; (b) K. A. King, P. J. Spellane and R. J. Watts, *J. Am. Chem. Soc.*, 1985, **25**, 1431.
- 2 *SAINT-Plus, version 6.02*, Bruker Analytical X-ray System, Madison, WI, 1999.
- 3 G. M. Sheldrick, *SADABS An empirical absorption correction program, Bruker Analytical X-ray Systems*, Madison, WI, 1996.
- 4 G. M. Sheldrick, *SHELXTL-2014*, Universität of Göttingen, Göttingen, Germany, 2014.
